# Supplementary material for: Quantifying the agricultural footprint on the silicon cycle: insights from silicon isotopes and Ge∕Si ratios
Source: Copernicus journal article supplement (doi:10.5194/bg-22-6067-2025), 2025-10-24
Supplement: Supplementary file 1 [file Supplementary_López-Urzúa_et_al.pdf › Supplementary_López-Urzúa_et_al.pdf]

## Supporting tables:

The excel file Supplementary\_tables\_López-Urzuá\_et al. contains supplementary data of the manuscript in Biogeosciences entitled " Quantifying the agricultural footprint on the silicon cycle: Insights from silicon isotopes and Ge/Si ratios" by López-Urzuá et al. It consists of three spreadsheets:

- Table S1: Compilation of  $\delta^{30}\text{Si}$  and Ge/Si ratios reported in literature for relevant to the studied catchment, including plagioclase, muscovite and quartz.
- Table S2: Results over 22 years for the calculated Si export as dissolved species, erosion, and harvest as determined by the Si mass balance model.
- Table S3: Dataset of mineralogical and chemical parameters used to calculate  $h_{regolith}^{Si}$ . The table includes primary and secondary mineral contributions, their stoichiometry as well as the  $\text{SiO}_2$  and  $\text{TiO}_2$  concentration and the normalized values after the quartz correction. The table includes the calculations for the parameters in Eq. (9) such as  $\tau_{prim}^{Si}$ , CDF,  $e_{sec}^{Si}$ , and  $e_{org}^{Si}$ . Parameters were determined through chemical and mineralogical analyses, with statistical summaries in green and outliers in red

## Supporting figures:

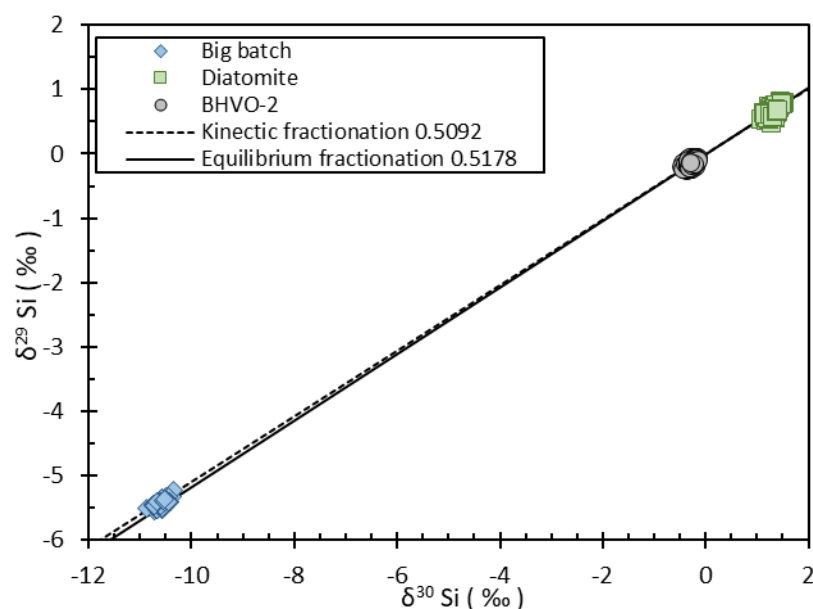

**Figure S1.** “Three-isotope” plot of Si for the three reference materials BHVO-2, Big Batch and Diatomite measured in the course of this study. Our data fall along a mass-dependent fractionation line with a slope of  $0.5120 \pm 0.0426$  (standard error) which is consistent with the slopes of the theoretical mass-dependent fractionation lines, i.e., 0.5092 and 0.5178 for kinetic and equilibrium fractionation, respectively.

## References:

- Aguirre, A. A., Derry, L. A., Mills, T. J., and Anderson, S. P.: Colloidal transport in the Gordon Gulch catchment of the Boulder Creek CZO and its effect on C-Q relationships for silicon, *Water Resources Research*, 53, 2368–2383, <https://doi.org/10.1002/2016WR019730>, 2017.
- Chmieleff, J., Horn, I., Steinhöfel, G., and Von Blanckenburg, F.: In situ determination of precise stable Si isotope ratios by UV-femtosecond laser ablation high-resolution multi-collector ICP-MS, *Chemical Geology*, 249, 155–166, <https://doi.org/10.1016/j.chemgeo.2007.12.003>, 2008.
- Douthitt, C. B.: The geochemistry of the stable isotopes of silicon, *Geochimica et Cosmochimica Acta*, 46, 1449–1458, [https://doi.org/10.1016/0016-7037\(82\)90278-2](https://doi.org/10.1016/0016-7037(82)90278-2), 1982.
- Evans, M. J. and Derry, L. A.: Quartz control of high germanium/silicon ratios in geothermal waters, *Geol*, 30, 1019, [https://doi.org/10.1130/0091-7613\(2002\)030<1019:QCOHGS>2.0.CO;2](https://doi.org/10.1130/0091-7613(2002)030<1019:QCOHGS>2.0.CO;2), 2002.
- Filippelli, G. M., Carnahan, J. W., Derry, L. A., and Kurtz, A.: Terrestrial paleorecords of Ge/Si cycling derived from lake diatoms, *Chemical Geology*, 168, 9–26, [https://doi.org/10.1016/S0009-2541\(00\)00185-6](https://doi.org/10.1016/S0009-2541(00)00185-6), 2000.
- Frings, P. J., Oelze, M., Schubring, F., Frick, D. A., and Von Blanckenburg, F.: Interpreting silicon isotopes in the Critical Zone, *Am J Sci*, 321, 1164–1203, <https://doi.org/10.2475/08.2021.02>, 2021.
- Georg, R. B., Zhu, C., Reynolds, B. C., and Halliday, A. N.: Stable silicon isotopes of groundwater, feldspars, and clay coatings in the Navajo Sandstone aquifer, Black Mesa, Arizona, USA, *Geochimica et Cosmochimica Acta*, 73, 2229–2241, <https://doi.org/10.1016/j.gca.2009.02.005>, 2009.

He, D., Lee, C. A., Yu, X., and Farner, M.: Ge/Si Partitioning in Igneous Systems: Constraints From Laser Ablation ICP-MS Measurements on Natural Samples, *Geochem Geophys Geosyst*, 20, 4472–4486, <https://doi.org/10.1029/2019GC008514>, 2019.

Kurtz, A. C., Lugolobi, F., and Salvucci, G.: Germanium-silicon as a flow path tracer: Application to the Rio Icacos watershed, *Water Resources Research*, 47, <https://doi.org/10.1029/2010WR009853>, 2011.

Liu, Y. and Li, X.-H.: New Quartz And Zircon Si Isotopic Reference Materials For Precise And Accurate SIMS Isotopic Microanalysis, *At.Spectrosc.*, 43, <https://doi.org/10.46770/AS.2021.1110>, 2022.

Lugolobi, F., Kurtz, A. C., and Derry, L. A.: Germanium–silicon fractionation in a tropical, granitic weathering environment, *Geochimica et Cosmochimica Acta*, 74, 1294–1308, <https://doi.org/10.1016/j.gca.2009.11.027>, 2010.

Mortlock, R. A. and Froelich, P. N.: A simple method for the rapid determination of biogenic opal in pelagic marine sediments, *Deep Sea Research Part A. Oceanographic Research Papers*, 36, 1415–1426, [https://doi.org/10.1016/0198-0149\(89\)90092-7](https://doi.org/10.1016/0198-0149(89)90092-7), 1989.

Novokahatskiy, I. P., Kalinin, S. K., and Zamyatina, G. M.: Germanium content of igneous and altered rocks of Kazakhstan, *Geochemistry International USSR*, 4, 1192–1196, 1967.

Savage, P. S., Georg, R. B., Williams, H. M., and Halliday, A. N.: The silicon isotope composition of the upper continental crust, *Geochimica et Cosmochimica Acta*, 109, 384–399, <https://doi.org/10.1016/j.gca.2013.02.004>, 2013.

Steinheofel, G., Breuer, J., Von Blanckenburg, F., Horn, I., Kaczorek, D., and Sommer, M.: Micrometer silicon isotope diagnostics of soils by UV femtosecond laser ablation, *Chemical Geology*, S0009254111002270, <https://doi.org/10.1016/j.chemgeo.2011.05.013>, 2011.

Steinheofel, G., Breuer, J., Von Blanckenburg, F., Horn, I., and Sommer, M.: The dynamics of Si cycling during weathering in two small catchments in the Black Forest (Germany) traced by Si isotopes, *Chemical Geology*, 466, 389–402, <https://doi.org/10.1016/j.chemgeo.2017.06.026>, 2017.

Ziegler, K., Chadwick, O. A., White, A. F., and Brzezinski, M. A.:  $\delta^{30}\text{Si}$  systematics in a granitic saprolite, Puerto Rico, *Geol*, 33, 817, <https://doi.org/10.1130/G21707.1>, 2005.
