# Supplementary material for: Quantifying the agricultural footprint on the silicon cycle: insights from silicon isotopes and Ge∕Si ratios
Source: Copernicus journal article supplement (doi:10.5194/bg-22-6067-2025), 2025-10-24
Supplement: Supplementary file 1 [file Supplementary_tables_López-Urzúa_et_al.xlsx]

## Sheet: Table S1
		Ge/Si ratios (µmol mol-1)
		bulk			Quartz			Plagioclase			Feldspar			Muscovite			Biotite			hornblende			kaolinite			kyanite
	Type of rock	mean	SD	n	mean	SD	n	mean	SD	n	mean	SD	n	mean	SD	n	mean	SD	n	mean	SD	n	mean	SD	n	mean	SD	n	Reference	site
	Paleoproterozoic biotite gneiss with granitoid intrusions				1.03						1.88			2.02			2.58												Aguirre et al., 2017	Gordon Gulch subcatchment of the Boulder Creek CZO
	Quartz Diorite	2.4			0.5						3.1						6.1			6.6									Kurtz et al., 2011	Luquillo Experimental Forest
	saprolite minerals				0.5												5.3						5.9
	Quartz Diorite	2			0.5						1.5						5.2			7									Lugolobi et al., 2010	Luquillo Experimental Forest
	Saprolite Kaolinite																						5.27	0.72	3
	Gneiss										1.83			2.37			4.04									1.73			Evans and Derry, 2002	High Himalayan Crystalline Series gneisses near Dordi Khola
	Gneiss	1.19	0.2	2																									Filippelli et al., 2000	San Bernardino Mountains within southern California’s San Gorgonio Wilderness Area
	Granite	1.29												2			4.1
	plagioclase‐phyric andesite	3.27	0.27	8				2.21	0.27	8										20.98	1.64	8							He et al., 2019	Mount Hood in Oregon, USA
	granitic plutonic							3.47	0.38	13	3.3	0.12	5																	Bernasconi Hills pluton in California, USA
	Tonalite				1.08	0.2	5	3.07	0.49	10							21.92	0.9	5											Domenigoni Valley pluton in California, USA
	Igneous rocks				~0.5			~1									~9			~4									Novokahatskiy et al., 1967 cited in Mortlock and Froelic, 1987	Kazakhstan
	all data				0.722	0.3045	5	2.91667	0.643843	3	2.322	0.817753	5	2.13	0.208087	3	7.03429	6.66141	7
					Quartz						Feldspar			Muscovite			Biotite =Chamosite
		selected values			0.722	0.3045	5				2.545	0.771548	8	2.13	0.208087	3	4.55333	1.24346	6
		δ³⁰Si (‰)
		bulk			Qtz			Plagioclase			K-feld			Albite			Biotite			Amphibole			illite			lepidolite
	Type of rock	mean	SD	n	mean	SD	n	mean	SD	n	mean	SD	n	mean	SD	n	mean	SD	n	mean	SD	n	mean	SD	n	mean	SD	n	Reference	Site
	Granite	-0.14	0.03	9	-0.2	0.05	25	-0.16	0.07	1	-0.2	0.04	30				-1.01	0.38	4										Frings et al., 2020a	Alps
	Granite	-0.19	0.04	6	-0.14	0.05	14	-0.21	0.05	27	-0.19	0.1	7				-0.58	0.04	18											Sierra Nevada
	Granite	-0.11	0.03	5	-0.07	0.08	18	-0.23	0.06	22	-0.26	0.12	10				-0.48	0.09	16											Sri Lanka
	Pegmatite				-0.34	0.11								-0.48	0.14	11													Savage et al., 2013	Megaliggar pegmatite
	Lepidolite granite				-0.33	0.07	11							-0.43	0.08	11										-0.4	0.12	11		Megaliggar pegmatite
	Pegmatitic aplite										-0.22	0.03	11	-0.29	0.03	11										-0.31	0.16	11		Meldon pegmatite
	Caltech rose quartz				0.1	0.13	14																						Chmeleff et al., 2008	Caltech rose quartz
	Sandstone				-0.36	0.31	7				-0.43	0.24	6										-0.68	0.19	5				Steinhoefel et al., 2011	Black Forest, Germany
	Paragneiss				-0.33	0.08	5				-0.47	0.21	4				-0.71	0.19	4
	Sandstone				-0.35	0.27	18				-0.49	0.3	19										-0.68	0.18	5				Steinhoefel et al., 2017	Black Forest, Germany
	Paragneiss				-0.22	0.4	18				-0.48	0.32	12				-0.69	0.37	16
	Granite				-0.2	0.13	10	-0.1									-0.6												Ziegler et al., 2005	Luquillo, Puerto Rico
	Monzonite				-0.03	0.05	20																						Liu et al., 2022	Qinghu monzonite pluton, Southwestern Nanling Range, South China
	Sandstone				-0.09	0.04	9				-0.15	0.04	16										-0.33	0.14	5*				Georg et al., 2009	Navajo Sandstones, Arizona EEUU *= secondary clays
	Monzonite				0						-0.2																		Douthitt. 1982	Eagle Mts., CA
	Rose quartz std				0
	Pegmatite				-0.2																									RuggIes
	Pegmatite				-0.1																									Evje, Norway
	Shale				0.1																									Antrim Shale
	all data				-0.153333	0.152277	18	-0.175	0.058023	4	-0.309	0.139877	10	-0.4	0.0984886	3	-0.678333	0.182364	6				-0.563333	0.202073	3	-0.355	0.0636396	2
					Quartz						Feldspar + plagioclase						Biotite=chamosite			Muscovite
		selected values			-0.0572727	0.103643	11				-0.293529	0.136517	17				-0.678333	0.182364	6	-0.485931	0.113901	0

## Sheet: Table S2
Start Date	End Date	Year	Annual Flux (mm/year)		error	E
				(mol/m2.y)	(mol/m2.y)	(Kg/m2/year)	(mol/m2.y)
2000-09-01	2001-08-31	Y1	669.269	0.081	0.0001	0.022	0.271	0.78	0.23	-0.02
2001-09-01	2002-08-31	Y2	226.458	0.031	0	0.006	0.078	0.23	0.09	0.69
2002-09-01	2003-08-31	Y3	430.324	0.054	0.0001	0.014	0.167	0.48	0.16	0.36
2003-09-01	2004-08-31	Y4	245.991	0.032	0.0001	0.007	0.086	0.25	0.09	0.66
2004-09-01	2005-08-31	Y5	113.562	0.016	0	0.002	0.029	0.08	0.05	0.87
2005-09-01	2006-08-31	Y6	169.144	0.023	0	0.004	0.053	0.15	0.07	0.78
2006-09-01	2007-08-31	Y7	449.791	0.057	0.0001	0.014	0.175	0.51	0.16	0.33
2007-09-01	2008-08-31	Y8	317.608	0.041	0.0001	0.01	0.117	0.34	0.12	0.54
2008-09-01	2009-08-31	Y9	280.768	0.037	0.0001	0.008	0.101	0.29	0.11	0.6
2009-09-01	2010-08-31	Y10	413.105	0.052	0.0001	0.013	0.159	0.46	0.15	0.39
2010-09-01	2011-08-31	Y11	220.581	0.029	0	0.006	0.075	0.22	0.08	0.7
2011-09-01	2012-08-31	Y12	138.744	0.019	0	0.003	0.04	0.11	0.06	0.83
2012-09-01	2013-08-31	Y13	493.391	0.062	0.0001	0.016	0.194	0.56	0.18	0.26
2013-09-01	2014-08-31	Y14	584.307	0.07	0.0001	0.019	0.234	0.68	0.2	0.12
2014-09-01	2015-08-31	Y15	326.038	0.042	0	0.01	0.121	0.35	0.12	0.53
2015-09-01	2016-08-31	Y16	324.579	0.042	0.0001	0.01	0.121	0.35	0.12	0.53
2016-09-01	2017-08-31	Y17	88.7678	0.013	0	0.001	0.018	0.05	0.04	0.91
2017-09-01	2018-08-31	Y18	240.895	0.032	0	0.007	0.084	0.24	0.09	0.66
2018-09-01	2019-08-31	Y19	226.919	0.031	0	0.006	0.078	0.23	0.09	0.69
2019-09-01	2020-08-31	Y20	656.028	0.08	0.0001	0.022	0.265	0.77	0.23	0
2020-09-01	2021-08-31	Y21	437.726	0.056	0.0001	0.014	0.17	0.49	0.16	0.35
2021-09-01	2022-08-31	Y22	187.165	0.026	0	0.005	0.061	0.18	0.07	0.75
Mean				0.042		0.01	0.12	0.36	0.12	0.52
SD				0.02		0.006	0.07	0.21	0.06	0.2693

## Sheet: Table S3
		Primary minerals					Secondary minerals
Depth	Name	quartz	muscovite	Albite	Microcline	chamosite	Kaolinite	vermiculite	Total TiO2 (%)	Total SiO2 (%)	SiO2-qtz	Si normalized	Ti normalized	OM (ppm)	SiO2 (ppm)	SiO2(%)
	Shale	62.6	12.93	11.05		13.4			0.736014	82.2156	19.6156	52.4481	1.96795
5	240 Lag	65.9704	24.1663	5.90378			3.66789		0.832676	70.4381	4.46764	13.1287	2.44692	71800	1816.54	0.181654
25	240 Ea	63.8272	24.7067				3.91911	3.42866	0.814066	75.1942	11.367	31.4241	2.25049
35	240 Btg	51.3465	34.7838				7.32966		0.877125	82.3974	31.0509	63.8206	1.8028
65	240 Ctg	54.6259	31.8632	3.48751			5.17291		0.782233	71.0118	16.3858	36.1128	1.72397
5	288 La	67.1078	21.4672	7.49338			3.00481		0.973144	79.0347	11.9269	36.2605	2.95859	41033	1038.13	0.103813
45	288 S1	72.8998	19.0546	4.00879			3.76641	0.270418	0.954362	79.1995	6.2997	23.2459	3.5216
65	288 S2	62.1891	21.7055	4.26028	5.60293		5.55618	0.423408	0.953773	79.2987	17.1095	45.2503	2.52248
85	288 S/Sg	71.0797	20.9658	4.44268			2.99625	0.113099	0.985835	81.4043	10.3246	35.7002	3.4088
	Formula	SiO2	KAl2​(AlSi3O10)​(OH)2​	NaAlSi3​O8	KAlSi3​O8​	(Fe²⁺)5Al(Si3Al)O₁₀(OH)₈	Al2​Si2​O5​(OH)4	Mg2Al2(Al2Si2)O10(OH)2*8H2O	TiO2	SiO2
	Atoms of Si	1	3	3	3	3	2	2	1	1
	Mineral molar mass	59.89	397.11	261.44	277.55	712.65	257.24	381.21	47	59.8
	Si content (%)	46.7524	21.1528	32.1297	30.2648	11.787	21.7696	14.6901	78.8	46.7524
									Normalized to quartz
									Determined from chemisty			Determined from mineralogy
	Contribution proportion								Ti (g mol-1)	Si (g mol-1)	CDF		[Si]sec/[Si]rock	esec	[Si]org	[Si]org/[Si]rock	eorg
	Shale	29.267	2.73506	3.55034		1.57946			1.55075	24.5207
	240 Lag	30.8427	5.11185	1.89687			0.798483		1.92817	6.13798	0.195742	-0.28329	0.101525	0.0816526	0.0849276	0.0107984	0.00868467
	240 Ea	29.8407	5.22616				0.853173	0.503672	1.77339	14.6915	0.125546	-0.418929	0.17252	0.150861
	240 Btg	24.0057	7.35776				1.59563		1.42061	29.8376	-0.0916091	0.0212272	0.202882	0.221468
	240 Ctg	25.5389	6.73997	1.12053			1.12612		1.35848	16.8836	-0.141527	0.140894	0.143184	0.163448
	288 La	31.3745	4.54092	2.4076			0.654134		2.33137	16.9527	0.334834	-0.412332	0.0831717	0.055323	0.0485353	0.00617116	0.00410485
	288 S1	34.0824	4.03059	1.28801			0.819931	0.0397246	2.77502	10.868	0.441177	-0.622096	0.109303	0.0610813
	288 S2	29.0749	4.59132	1.36882	1.69572		1.20955	0.062199	1.98772	21.1556	0.219835	-0.240568	0.161701	0.126153
	288 S/Sg	33.2314	4.43485	1.42742			0.65227	0.0166144	2.68613	16.6907	0.422684	-0.569683	0.0850473	0.0490991
										mean	0.188335	-0.298097		0.113636			0.00639476
										sd	0.217938	0.268486		0.0621077			0.00323842
										n	8	8		8			2
Red values were excluded as they do not represent valid CDF values. Sample 240 Btg corresponds to an illuvial horizon.										mean	0.28997	-0.424483		0.0873617			selected
Green values represent the mean and standard deviation (SD) used to calculate										SD	0.129091	0.151045		0.0418346
										n	6	6		6
											selected	selected		selected
