# Supplementary material for: Quantifying the agricultural footprint on the silicon cycle: insights from silicon isotopes and Ge∕Si ratios
Source: Copernicus journal article supplement (doi:10.5194/bg-22-6067-2025), 2025-10-24
Supplement: Supplementary file [file bg-22-6067-2025-supplement-title-page.pdf › bg-22-6067-2025-supplement-title-page.pdf]

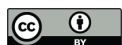

*Supplement of*

**Quantifying the agricultural footprint on the silicon cycle: insights from silicon isotopes and Ge/Si ratios**

**Sofía López-Urzúa et al.**

*Correspondence to:* Sofía López-Urzúa ([slopezurzua@gmail.com](mailto:slopezurzua@gmail.com))

- [bg-22-6067-2025-supplement-title-page.pdf](#)
- [Figure S1.png](#)
- [Supplementary\\_López-Urzúa\\_et\\_al.pdf](#)
- [Supplementary\\_tables\\_López-Urzúa\\_et\\_al.xlsx](#)

The copyright of individual parts of the supplement might differ from the article licence.
